# Supplementary material for: Hippocampuswhitei Bleeker, 1855, a senior synonym of the southern Queensland seahorse H.procerus Kuiter, 2001: molecular and morphological evidence (Teleostei, Syngnathidae)
Source: Zookeys. 2019 Feb 14;(824):109–33. doi: 10.3897/zookeys.824.30921 (PMC6389870; doi:10.3897/zookeys.824.30921)
Supplement: Supplementary material 3 [file zookeys-824-109-s003.xls]

## Sheet: Export Summary
	This document was exported from Numbers. Each table was converted to an Excel worksheet. All other objects on each Numbers sheet were placed on separate worksheets. Please be aware that formula calculations may differ in Excel.
	Numbers Sheet Name	Numbers Table Name	Excel Worksheet Name
	MatrixOutput
		Table 1	MatrixOutput
	Caption
		Table 1	Caption

## Sheet: MatrixOutput
	Species	1	2	3	4	5	6	7	8	9	10	11	12	13	14	15	16	17	18	19	20	21	22	23	24	25	26	27	28	29	30	31	32	33	34	35	36
1	Hippocampus_procerus_CAS_241511_GoldCoast
2	Hippocampus_procerus_CAS_241512_GoldCoast	0.0046875
3	Hippocampus_procerus_CAS_241513_GoldCoast	0.0046875	0
4	Hippocampus_procerus_CAS_241514_GoldCoast	0.0015625	0.00625	0.00625
5	Hippocampus_whitei_HH_0418_Sydney	0.00625	0.0015625	0.0015625	0.0078125
6	Hippocampus_whitei_HH_0419_Sydney	0.0046875	0	0	0.00625	0.0015625
7	Hippocampus_whitei_HH_0469_Sydney	0.0046875	0	0	0.00625	0.0015625	0
8	Hippocampus_whitei_HH_0470_Sydney	0.00625	0.0015625	0.0015625	0.0078125	0	0.0015625	0.0015625
9	Hippocampus_whitei_HH_0667_Sydney	0.0046875	0	0	0.00625	0.0015625	0	0	0.0015625
10	Hippocampus_whitei_HH_1276_Empire	0.0046875	0	0	0.00625	0.0015625	0	0	0.0015625	0
11	Hippocampus_whitei_HH_1277_Empire	0.0046875	0	0	0.00625	0.0015625	0	0	0.0015625	0	0
12	Hippocampus_whitei_HH_1287_Nelson	0.0046875	0	0	0.00625	0.0015625	0	0	0.0015625	0	0	0
13	Hippocampus_whitei_HH_1290_Tuggerah	0.0046875	0	0	0.00625	0.0015625	0	0	0.0015625	0	0	0	0
14	Hippocampus_whitei_HH_1291_Tuggerah	0.0046875	0	0	0.00625	0.0015625	0	0	0.0015625	0	0	0	0	0
15	Hippocampus_whitei_HH_1292_Tuggerah	0.0046875	0	0	0.00625	0.0015625	0	0	0.0015625	0	0	0	0	0	0
16	Hippocampus_whitei_HH_1295_Nelson	0.0078125	0.003125	0.003125	0.009375	0.0046875	0.003125	0.003125	0.0046875	0.003125	0.003125	0.003125	0.003125	0.003125	0.003125	0.003125
17	Hippocampus_whitei_HH_1299a_Nelson	0.0046875	0	0	0.00625	0.0015625	0	0	0.0015625	0	0	0	0	0	0	0	0.003125
18	Hippocampus_whitei_HH_1300a_Nelson	0.00625	0.0015625	0.0015625	0.0078125	0.003125	0.0015625	0.0015625	0.003125	0.0015625	0.0015625	0.0015625	0.0015625	0.0015625	0.0015625	0.0015625	0.0046875	0.0015625
19	Hippocampus_whitei_HH_1305_Nelson	0.00625	0.0015625	0.0015625	0.0078125	0.003125	0.0015625	0.0015625	0.003125	0.0015625	0.0015625	0.0015625	0.0015625	0.0015625	0.0015625	0.0015625	0.0046875	0.0015625	0.003125
20	Hippocampus_whitei_HH_1321_Hacking	0.0046875	0	0	0.00625	0.0015625	0	0	0.0015625	0	0	0	0	0	0	0	0.003125	0	0.0015625	0.0015625
21	Hippocampus_whitei_HH_1322_Hacking	0.0046875	0	0	0.00625	0.0015625	0	0	0.0015625	0	0	0	0	0	0	0	0.003125	0	0.0015625	0.0015625	0
22	Hippocampus_whitei_HH_1329_Hacking	0.0046875	0	0	0.00625	0.0015625	0	0	0.0015625	0	0	0	0	0	0	0	0.003125	0	0.0015625	0.0015625	0	0
23	Hippocampus_whitei_HH_1330_Hacking	0.0046875	0	0	0.00625	0.0015625	0	0	0.0015625	0	0	0	0	0	0	0	0.003125	0	0.0015625	0.0015625	0	0	0
24	Hippocampus_whitei_HH_1340_Hacking	0.0046875	0	0	0.00625	0.0015625	0	0	0.0015625	0	0	0	0	0	0	0	0.003125	0	0.0015625	0.0015625	0	0	0	0
25	Hippocampus_whitei_HH_1341_Hacking	0.0046875	0	0	0.00625	0.0015625	0	0	0.0015625	0	0	0	0	0	0	0	0.003125	0	0.0015625	0.0015625	0	0	0	0	0
26	Hippocampus_whitei_HH_1352_Nelson	0.0046875	0	0	0.00625	0.0015625	0	0	0.0015625	0	0	0	0	0	0	0	0.003125	0	0.0015625	0.0015625	0	0	0	0	0	0
27	Hippocampus_whitei_HH_1353_Nelson	0.00625	0.0015625	0.0015625	0.0078125	0.003125	0.0015625	0.0015625	0.003125	0.0015625	0.0015625	0.0015625	0.0015625	0.0015625	0.0015625	0.0015625	0.0046875	0.0015625	0.003125	0	0.0015625	0.0015625	0.0015625	0.0015625	0.0015625	0.0015625	0.0015625
28	Hippocampus_whitei_HH_1354_Nelson	0.0046875	0	0	0.00625	0.0015625	0	0	0.0015625	0	0	0	0	0	0	0	0.003125	0	0.0015625	0.0015625	0	0	0	0	0	0	0	0.0015625
29	Hippocampus_whitei_HH_1357_Nelson	0.0046875	0	0	0.00625	0.0015625	0	0	0.0015625	0	0	0	0	0	0	0	0.003125	0	0.0015625	0.0015625	0	0	0	0	0	0	0	0.0015625	0
30	Hippocampus_whitei_HH_1359_Nelson	0.0046875	0	0	0.00625	0.0015625	0	0	0.0015625	0	0	0	0	0	0	0	0.003125	0	0.0015625	0.0015625	0	0	0	0	0	0	0	0.0015625	0	0
31	Hippocampus_whitei_HH_1363_Forster	0.0046875	0	0	0.00625	0.0015625	0	0	0.0015625	0	0	0	0	0	0	0	0.003125	0	0.0015625	0.0015625	0	0	0	0	0	0	0	0.0015625	0	0	0
32	Hippocampus_whitei_HH_1364_Forster	0.003125	0.0078125	0.0078125	0.0046875	0.009375	0.0078125	0.0078125	0.009375	0.0078125	0.0078125	0.0078125	0.0078125	0.0078125	0.0078125	0.0078125	0.0109375	0.0078125	0.009375	0.009375	0.0078125	0.0078125	0.0078125	0.0078125	0.0078125	0.0078125	0.0078125	0.009375	0.0078125	0.0078125	0.0078125	0.0078125
33	Hippocampus_whitei_HH_1365_Forster	0.0015625	0.00625	0.00625	0.003125	0.0078125	0.00625	0.00625	0.0078125	0.00625	0.00625	0.00625	0.00625	0.00625	0.00625	0.00625	0.009375	0.00625	0.0078125	0.0078125	0.00625	0.00625	0.00625	0.00625	0.00625	0.00625	0.00625	0.0078125	0.00625	0.00625	0.00625	0.00625	0.0015625
34	Hippocampus_whitei_HH_1366_Forster	0.0046875	0	0	0.00625	0.0015625	0	0	0.0015625	0	0	0	0	0	0	0	0.003125	0	0.0015625	0.0015625	0	0	0	0	0	0	0	0.0015625	0	0	0	0	0.0078125	0.00625
35	Hippocampus_whitei_HH_1367_Forster	0.0046875	0	0	0.00625	0.0015625	0	0	0.0015625	0	0	0	0	0	0	0	0.003125	0	0.0015625	0.0015625	0	0	0	0	0	0	0	0.0015625	0	0	0	0	0.0078125	0.00625	0
36	Hippocampus_whitei_HH_1368_Forster	0.0046875	0	0	0.00625	0.0015625	0	0	0.0015625	0	0	0	0	0	0	0	0.003125	0	0.0015625	0.0015625	0	0	0	0	0	0	0	0.0015625	0	0	0	0	0.0078125	0.00625	0	0

## Sheet: Caption
Table. Estimates of Evolutionary Divergence between Sequences
The number of base differences per site from between sequences are shown. The analysis involved 36 nucleotide sequences. All positions containing gaps and missing data were eliminated. There were a total of 640 positions in the final dataset. Evolutionary analyses were conducted in MEGA7 [1].
1. Kumar S., Stecher G., and Tamura K. (2016). MEGA7: Molecular Evolutionary Genetics Analysis version 7.0 for bigger datasets.Molecular Biology and Evolution 33:1870-1874.
Disclaimer: Although utmost care has been taken to ensure the correctness of the caption, the caption text is provided "as is" without any warranty of any kind. Authors advise the user to carefully check the caption prior to its use for any purpose and report any errors or problems to the authors immediately (www.megasoftware.net). In no event shall the authors and their employers be liable for a…
